# Supplementary material for: Association of plasma mitochondrial DNA with COPD severity and progression in the SPIROMICS cohort
Source: PubMed Central journal article supplement (PMC8074408; doi:10.1186/s12931-021-01707-x), 2021-04-26
Supplement: 12931_2021_1707_MOESM1_ESM.pdf [file 12931_2021_1707_MOESM1_ESM.pdf]

## **SUPPLEMENTARY FIGURE LEGENDS**

### **Supplementary Figure 1. P-mtDNA levels do not differ between males and females.**

P-mtDNA levels in COPD subgroups (A, male non-smokers n=42, male smokers n=96, male mild/moderate COPD n=130, male severe COPD n=122; female non-smokers n=58, female smokers n=103, female mild/moderate COPD n=71, female severe COPD n=78) and in males and females overall (B). Data are presented as median with box indicating upper and lower quartiles, whiskers indicating extrema, and with p-values calculated by Tukey's range test.

### **Supplementary Figure 2. P-mtDNA is not associated with smoking status. P-**

mtDNA levels in non-smokers (n=100), former smokers (n=377), and current smokers (n=211); of the 700 participants in whom p-mtDNA levels were measured, 12 had unknown smoking status. Data are presented as median with box indicating upper and lower quartiles, whiskers indicating extrema, and with p-values calculated by Tukey's range test.

### **Supplementary Figure 3. P-mtDNA is not associated with u-mtDNA. Log p-mtDNA**

and association with log u-mtDNA, tested with unadjusted linear regression models (never smokers n=47, smokers without airflow obstruction n=78, mild/moderate COPD n=93, severe COPD n=166). Unadjusted association was tested using Pearson's correlation coefficient.

### **Supplementary Figure 4. Baseline p-mtDNA levels do not differ between study**

**participants with and without exacerbations.** P-mtDNA levels stratified by number of moderate (A) and severe (B) exacerbations, in subgroups of 0 (moderate=391,

severe=521), 1-2 (moderate=154, severe=120), 3-5 (moderate=80, severe=40), and 6+ (moderate=64, severe=7). Data are presented as median with box indicating upper and lower quartiles, whiskers indicating extrema, and with p-values calculated by Spearman's rank correlation test.

**Supplementary Figure 5. Baseline p-mtDNA levels do not differ by study**

**participant mortality.** P-mtDNA levels in study participants who died during follow-up (n=48) and those who did not (n=642). Data are presented as median with box indicating upper and lower quartiles, whiskers indicating extrema, and with p-values calculated by Wilcoxon signed-rank test.

**Supplementary Table 1. P-mtDNA Cohort Compared to Overall SPIROMICS Cohort.**

| Parameter                                                                                                                                                                                                                                                                                                                                   | Plasma mtDNA Cohort (n = 700) | SPIROMICS Cohort (n = 2973) | P-value* |
|---------------------------------------------------------------------------------------------------------------------------------------------------------------------------------------------------------------------------------------------------------------------------------------------------------------------------------------------|-------------------------------|-----------------------------|----------|
| Age [IQR]                                                                                                                                                                                                                                                                                                                                   | 64 [56, 70]                   | 64 [56 - 70]                | 0.2      |
| Sex N (%)                                                                                                                                                                                                                                                                                                                                   |                               |                             | 0.2      |
| Male                                                                                                                                                                                                                                                                                                                                        | 390 (56%)                     | 1577 (53%)                  |          |
| Female                                                                                                                                                                                                                                                                                                                                      | 310 (44%)                     | 1397 (47%)                  |          |
| Race N (%)                                                                                                                                                                                                                                                                                                                                  |                               |                             | 0.5      |
| Asian                                                                                                                                                                                                                                                                                                                                       | 5 (0.7%)                      | 14 (0.5%)                   |          |
| Black                                                                                                                                                                                                                                                                                                                                       | 130 (19%)                     | 576 (19%)                   |          |
| White                                                                                                                                                                                                                                                                                                                                       | 529 (76%)                     | 2262 (77%)                  |          |
| Baseline Current Smoking N (%)                                                                                                                                                                                                                                                                                                              | 211 (31%)                     | 1092 (37%)                  | 0.002    |
| Subgroup N (%)                                                                                                                                                                                                                                                                                                                              |                               |                             | <0.001   |
| Non-Smokers                                                                                                                                                                                                                                                                                                                                 | 100 (14%)                     | 202 (6.8%)                  |          |
| Smokers                                                                                                                                                                                                                                                                                                                                     | 199 (28%)                     | 941 (32%)                   |          |
| Mild/Moderate COPD                                                                                                                                                                                                                                                                                                                          | 201 (29%)                     | 1205 (41%)                  |          |
| Severe COPD                                                                                                                                                                                                                                                                                                                                 | 200 (29%)                     | 625 (21%)                   |          |
| Baseline FEV <sub>1</sub> % Predicted [IQR]                                                                                                                                                                                                                                                                                                 | 77 [46, 96]                   | 79 [55, 95]                 | 0.09     |
| Baseline 6MWD [IQR]                                                                                                                                                                                                                                                                                                                         | 420 [345, 485]                | 411 [339, 475]              | 0.14     |
| Baseline CAT [IQR]                                                                                                                                                                                                                                                                                                                          | 12 [6, 20]                    | 13 [7, 20]                  | 0.4      |
| Baseline SGRQ [IQR]                                                                                                                                                                                                                                                                                                                         | 30 [12, 48]                   | 30 [13, 48]                 | 0.7      |
| Eligible for 1-Year Follow-Up (%)                                                                                                                                                                                                                                                                                                           | 700 (100%)                    | 2972 (100%)                 | >0.9     |
| Completed 1-Year Follow-Up (%)                                                                                                                                                                                                                                                                                                              | 609 (87%)                     | 2324 (78%)                  | <0.001   |
| Eligible for 3-Year Follow-Up (%)                                                                                                                                                                                                                                                                                                           | 566 (81%)                     | 1757 (59%)                  | <0.001   |
| Completed 3-Year Follow-Up                                                                                                                                                                                                                                                                                                                  | 384 (68%)                     | 893 (51%)                   | <0.001   |
| <p>*Kruskal-Wallis test, Chi-square test, or Fisher's exact test comparing participants within each subgroup, as appropriate<br/> Abbreviations: IQR=interquartile interval, FEV<sub>1</sub>=forced expiratory volume in 1 second, 6MWD=six-minute walk distance, SGRQ=St. George's Respiratory Questionnaire, CAT=COPD Assessment Test</p> |                               |                             |          |

**Supplementary Table 2. P-mtDNA between Subgroups.**

| Subgroups compared                                                                                                                                                                                                       | Adjusted for age, sex & smoking status |                  | Adjusted p-value for multiple comparisons |
|--------------------------------------------------------------------------------------------------------------------------------------------------------------------------------------------------------------------------|----------------------------------------|------------------|-------------------------------------------|
|                                                                                                                                                                                                                          | $\hat{\beta}$ (CI)                     | <i>P-value</i> * | <i>P-value</i> *                          |
| Never smokers – Smokers without airflow obstruction                                                                                                                                                                      | -0.07<br>(-0.62, 0.49)                 | 0.81             | 0.81                                      |
| Smokers without airflow obstruction – Mild/moderate COPD                                                                                                                                                                 | 0.34<br>(-0.05, 0.74)                  | 0.085            | 0.26                                      |
| Smokers without airflow obstruction – Severe COPD                                                                                                                                                                        | -0.19<br>(-0.60, 0.21)                 | 0.35             | 0.53                                      |
| Mild/moderate COPD – Severe COPD                                                                                                                                                                                         | -0.55<br>(-0.93, -0.17)                | 0.005            | 0.029                                     |
| *Pairwise contrasts of strata using Tukey’s range test (unadjusted and adjusted)<br>Abbreviations: $\hat{\beta}$ =estimated change log2 UACR with a one unit increase in clinical characteristic, CI=confidence interval |                                        |                  |                                           |

**Supplementary Table 3. P-mtDNA and Clinical COPD Measures.**

|                                                                                                                                                                                                                                                                                                                                                                 | Unadjusted<br><i>r</i> (CI)* | Adjusted for age &<br>smoking status<br><i>r</i> (CI)* |
|-----------------------------------------------------------------------------------------------------------------------------------------------------------------------------------------------------------------------------------------------------------------------------------------------------------------------------------------------------------------|------------------------------|--------------------------------------------------------|
| FEV <sub>1</sub> % predicted                                                                                                                                                                                                                                                                                                                                    | 0.02 (-0.05, 0.09)           | 0.03 (-0.04, 0.11)                                     |
| 6MWD (meters)                                                                                                                                                                                                                                                                                                                                                   | 0 (-0.07, 0.08)              | 0.02 (-0.06, 0.09)                                     |
| SGRQ                                                                                                                                                                                                                                                                                                                                                            | -0.02 (-0.10, 0.05)          | -0.02 (-0.10, 0.05)                                    |
| CAT                                                                                                                                                                                                                                                                                                                                                             | -0.01 (-0.09, 0.06)          | 0.01 (-0.08, 0.06)                                     |
| % Emphysema                                                                                                                                                                                                                                                                                                                                                     | -0.02 (-0.09, 0.05)          | -0.03 (-0.10, 0.04)                                    |
| *Pearson's correlation coefficients with log <sub>2</sub> p-mtDNA as among all participants and within each group<br>Abbreviations: <i>r</i> =correlation coefficient, CI=95% confidence interval, FEV <sub>1</sub> =forced expiratory volume in 1 second, 6MWD=six-minute walk distance, SGRQ=St. George's Respiratory Questionnaire, CAT=COPD Assessment Test |                              |                                                        |

**Supplementary Table 4. P-mtDNA and All-Cause Mortality.**

| Model      | Hazard Ratio (CI)   | P-value |
|------------|---------------------|---------|
| Unadjusted | 0.969 (0.831, 1.13) | 0.686   |
| Adjusted*  | 0.951 (0.813, 1.11) | 0.531   |
| Adjusted** | 0.989 (0.851, 1.15) | 0.888   |

Hazard ratios for all-cause mortality log2 p-mtDNA using Cox Proportional Hazard models with robust standard errors. \*Adjusting for age, sex, and smoking status. \*\*Adjusting for age, sex, smoking status, and subgroup.

**Supplementary Table 5. Baseline Characteristics of Participant with and without 1-Year Follow-Up Spirometry Data.**

| Parameter                                                                                                                                                                                                                                                                                                                                   | Complete Data<br>(n = 609) | Missing V2<br>(n = 91) | P-value* |
|---------------------------------------------------------------------------------------------------------------------------------------------------------------------------------------------------------------------------------------------------------------------------------------------------------------------------------------------|----------------------------|------------------------|----------|
| Age [IQR]                                                                                                                                                                                                                                                                                                                                   | 65 [56, 70]                | 62 [54, 68]            | 0.09     |
| Sex N (%)                                                                                                                                                                                                                                                                                                                                   |                            |                        | 0.7      |
| Male                                                                                                                                                                                                                                                                                                                                        | 337 (55%)                  | 53 (58%)               |          |
| Female                                                                                                                                                                                                                                                                                                                                      | 272 (45%)                  | 38 (42%)               |          |
| Race N (%)                                                                                                                                                                                                                                                                                                                                  |                            |                        | 0.2      |
| Asian                                                                                                                                                                                                                                                                                                                                       | 10 (1.7%)                  | 3 (3.4%)               |          |
| Black                                                                                                                                                                                                                                                                                                                                       | 108 (18%)                  | 22 (25%)               |          |
| White                                                                                                                                                                                                                                                                                                                                       | 467 (77%)                  | 62 (70%)               |          |
| Baseline Current Smoking N (%)                                                                                                                                                                                                                                                                                                              | 172 (29%)                  | 39 (44%)               | 0.005    |
| Baseline FEV <sub>1</sub> % Predicted [IQR]                                                                                                                                                                                                                                                                                                 | 79 [52, 97]                | 45 [31, 84]            | <0.001   |
| Baseline 6MWD [IQR]                                                                                                                                                                                                                                                                                                                         | 427 [360, 490]             | 347 [261, 415]         | <0.001   |
| Baseline CAT [IQR]                                                                                                                                                                                                                                                                                                                          | 12 [5, 19]                 | 17 [10, 23]            | <0.001   |
| Baseline SGRQ [IQR]                                                                                                                                                                                                                                                                                                                         | 27 [10, 45]                | 47 [28, 57]            | <0.001   |
| Deaths N (%)                                                                                                                                                                                                                                                                                                                                | 0 (0%)                     | 7 (7.7%)               | < 0.001  |
| <p>*Kruskal-Wallis test, Chi-square test, or Fisher's exact test comparing participants within each subgroup, as appropriate<br/> Abbreviations: IQR=interquartile interval, FEV<sub>1</sub>=forced expiratory volume in 1 second, 6MWD=six-minute walk distance, SGRQ=St. George's Respiratory Questionnaire, CAT=COPD Assessment Test</p> |                            |                        |          |

**Supplementary Table 6. Baseline Characteristics of Participant with and without 3-Year Follow-Up Spirometry Data.**

| Parameter                                                                                                                                                                                                                                                                                                                                   | Complete Data<br>(n = 384) | Missing V4<br>(n = 316) | P-value* |
|---------------------------------------------------------------------------------------------------------------------------------------------------------------------------------------------------------------------------------------------------------------------------------------------------------------------------------------------|----------------------------|-------------------------|----------|
| Age [IQR]                                                                                                                                                                                                                                                                                                                                   | 64 [56, 70]                | 65 [55, 70]             | 0.6      |
| Sex N (%)                                                                                                                                                                                                                                                                                                                                   |                            |                         | 0.4      |
| Male                                                                                                                                                                                                                                                                                                                                        | 209 (55%)                  | 53 (57%)                |          |
| Female                                                                                                                                                                                                                                                                                                                                      | 176 (46%)                  | 134 (43%)               |          |
| Race N (%)                                                                                                                                                                                                                                                                                                                                  |                            |                         | >0.9     |
| Asian                                                                                                                                                                                                                                                                                                                                       | 8 (2.1%)                   | 5 (1.6%)                |          |
| Black                                                                                                                                                                                                                                                                                                                                       | 72 (19%)                   | 58 (19%)                |          |
| White                                                                                                                                                                                                                                                                                                                                       | 289 (76%)                  | 240 (77%)               |          |
| Baseline Current Smoking N (%)                                                                                                                                                                                                                                                                                                              | 108 (28%)                  | 103 (34%)               | 0.2      |
| Baseline FEV <sub>1</sub> % Predicted [IQR]                                                                                                                                                                                                                                                                                                 | 81 [58, 99]                | 66 [39, 92]             | <0.001   |
| Baseline 6MWD [IQR]                                                                                                                                                                                                                                                                                                                         | 431 [368, 494]             | 396 [311, 464]          | <0.001   |
| Baseline CAT [IQR]                                                                                                                                                                                                                                                                                                                          | 11 [5, 19]                 | 14 [7, 21]              | <0.001   |
| Baseline SGRQ [IQR]                                                                                                                                                                                                                                                                                                                         | 25 [10, 44]                | 36 [16, 53]             | <0.001   |
| Deaths N (%)                                                                                                                                                                                                                                                                                                                                | 0 (0%)                     | 27 (8.6%)               | <0.001   |
| <p>*Kruskal-Wallis test, Chi-square test, or Fisher's exact test comparing participants within each subgroup, as appropriate<br/> Abbreviations: IQR=interquartile interval, FEV<sub>1</sub>=forced expiratory volume in 1 second, 6MWD=six-minute walk distance, SGRQ=St. George's Respiratory Questionnaire, CAT=COPD Assessment Test</p> |                            |                         |          |



**Supplementary Table 7. P-mtDNA and Disease Progression at 1-Year Follow-Up, Adjusted for Missingness.**

|                                    | Adjusted for age & smoking status<br><i>r</i> (CI)* | Adjusted for age, smoking status, and missingness<br><i>r</i> (CI)* |
|------------------------------------|-----------------------------------------------------|---------------------------------------------------------------------|
| <b>FEV<sub>1</sub> % predicted</b> |                                                     |                                                                     |
| All                                | -0.01 (-0.09, 0.06)                                 | -0.01 (-0.1, 0.08)                                                  |
| Males                              | -0.01 (-0.12, 0.09)                                 | -0.03 (-0.13, 0.07)                                                 |
| Male Smokers                       | -0.08 (-0.27, 0.1)                                  | -0.08 (-1.57, 1.4)                                                  |
| Male Mild/Mod                      | -0.05 (-0.26, 0.15)                                 | -0.03 (-0.61, 0.54)                                                 |
| Male Severe                        | 0.14 (-0.08, 0.35)                                  | 0.09 (-0.28, 0.47)                                                  |
| Females                            | -0.01 (-0.12, 0.1)                                  | 0 (-0.2, 0.2)                                                       |
| Female Smokers                     | 0.04 (-0.16, 0.23)                                  | 0.06 (-0.57, 0.68)                                                  |
| Female Mild/Mod                    | -0.11 (-0.35, 0.13)                                 | -0.07 (-0.97, 0.82)                                                 |
| Female Severe                      | 0.08 (-0.18, 0.34)                                  | -0.03 (-0.74, 0.68)                                                 |
| <b>6MWD (meters)</b>               |                                                     |                                                                     |
| All                                | -0.01 (-0.09, 0.07)                                 | -0.03 (-0.19, 0.14)                                                 |
| Males                              | 0.04 (-0.07, 0.15)                                  | 0 (-0.16, 0.15)                                                     |
| Male Smokers                       | -0.01 (-0.18, 0.16)                                 | -0.05 (-0.52, 0.42)                                                 |
| Male Mild/Mod                      | -0.05 (-0.27, 0.16)                                 | -0.10 (-0.51, 0.32)                                                 |
| Male Severe                        | 0.27 (0.05, 0.48) <sup>a</sup>                      | 0.30 (-0.07, 0.66)                                                  |
| Females                            | -0.09 (-0.21, 0.04)                                 | -0.21 (-0.67, 0.25)                                                 |
| Female Smokers                     | 0.03 (-0.17, 0.22)                                  | 0.03 (-0.25, 0.3)                                                   |
| Female Mild/Mod                    | 0.08 (-0.16, 0.32)                                  | 0.12 (-1.6, 1.83)                                                   |
| Female Severe                      | -0.30 (-0.59, -0.02) <sup>b</sup>                   | -0.66 (-5.95, 4.63)                                                 |
| <b>SGRQ</b>                        |                                                     |                                                                     |
| All                                | -0.03 (-0.12, 0.06)                                 | 0.01 (-0.11, 0.12)                                                  |
| Males                              | -0.04 (-0.16, 0.08)                                 | -0.04 (-0.19, 0.11)                                                 |
| Male Smokers                       | -0.1 (-0.3, 0.1)                                    | -0.07 (-0.74, 0.61)                                                 |
| Male Mild/Mod                      | 0 (-0.2, 0.2)                                       | 0.11 (-0.29, 0.5)                                                   |
| Male Severe                        | -0.16 (-0.41, 0.08)                                 | 0.09 (-2.44, 2.61)                                                  |
| Females                            | -0.01 (-0.14, 0.11)                                 | 0.01 (-0.28, 0.31)                                                  |
| Female Smokers                     | -0.15 (-0.38, 0.08)                                 | -0.15 (-0.84, 0.53)                                                 |
| Female Mild/Mod                    | 0.10 (-0.18, 0.37)                                  | 0.20 (-0.43, 0.82)                                                  |
| Female Severe                      | -0.10 (-0.39, 0.18)                                 | -0.21 (-1.72, 1.29)                                                 |
| <b>CAT</b>                         |                                                     |                                                                     |
| All                                | -0.07 (-0.15, 0.02)                                 | -0.04 (-0.12, 0.05)                                                 |
| Males                              | -0.01 (-0.11, 0.1)                                  | 0.03 (-0.15, 0.21)                                                  |
| Male Smokers                       | 0.04 (-0.14, 0.21)                                  | 0.07 (-1.04, 1.18)                                                  |
| Male Mild/Mod                      | -0.08 (-0.29, 0.12)                                 | -0.13 (-0.4, 0.13)                                                  |
| Male Severe                        | -0.05 (-0.27, 0.17)                                 | -0.10 (-0.93, 0.72)                                                 |
| Females                            | -0.14 (-0.27, -0.01)                                | -0.14 (-0.44, 0.17)                                                 |
| Female Smokers                     | -0.30 (-0.52, -0.08)                                | -0.36 (-0.77, 0.05)                                                 |

|                 |                      |                     |
|-----------------|----------------------|---------------------|
| Female Mild/Mod | -0.27 (-0.52, -0.01) | -0.21 (-1.31, 0.89) |
| Female Severe   | 0.03 (-0.22, 0.29)   | 0.05 (-0.54, 0.64)  |

\*Pearson's correlation coefficients with log2 p-mtDNA as among all participants and within each group  
<sup>a</sup>Light orange=statistically significant with positive correlation coefficient  
<sup>b</sup>Light blue=statistically significant with negative correlation coefficient  
Abbreviations: r=correlation coefficient, CI=95% confidence interval, FEV<sub>1</sub>=forced expiratory volume in 1 second, 6MWD=six-minute walk distance, SGRQ=St. George's Respiratory Questionnaire, CAT=COPD Assessment Test

**Supplementary Table 8. P-mtDNA and Disease Progression at 3-Year Follow-Up, Adjusted for Missingness.**

|                                                                                                                                                                                                                                                                                                                                                               | Adjusted for age & smoking status<br><i>r</i> (CI)* | Adjusted for age, smoking status, and missingness<br><i>r</i> (CI)* |
|---------------------------------------------------------------------------------------------------------------------------------------------------------------------------------------------------------------------------------------------------------------------------------------------------------------------------------------------------------------|-----------------------------------------------------|---------------------------------------------------------------------|
| <b>FEV<sub>1</sub> % predicted</b>                                                                                                                                                                                                                                                                                                                            |                                                     |                                                                     |
| All                                                                                                                                                                                                                                                                                                                                                           | 0.04 (-0.06, 0.14)                                  | 0.04 (-0.39, 0.46)                                                  |
| Males                                                                                                                                                                                                                                                                                                                                                         | 0.09 (-0.05, 0.23)                                  | 0.03 (-0.43, 0.49)                                                  |
| Females                                                                                                                                                                                                                                                                                                                                                       | -0.01 (-0.15, 0.13)                                 | -0.03 (-0.8, 0.73)                                                  |
| <b>6MWD (meters)</b>                                                                                                                                                                                                                                                                                                                                          |                                                     |                                                                     |
| All                                                                                                                                                                                                                                                                                                                                                           | -0.02 (-0.12, 0.08)                                 | -0.11 (-0.90, 0.69)                                                 |
| Males                                                                                                                                                                                                                                                                                                                                                         | 0.03 (-0.11, 0.17)                                  | -0.19 (-0.88, 0.50)                                                 |
| Females                                                                                                                                                                                                                                                                                                                                                       | -0.07 (-0.23, 0.08)                                 | 0.04 (-1.82, 1.90)                                                  |
| <b>SGRQ</b>                                                                                                                                                                                                                                                                                                                                                   |                                                     |                                                                     |
| All                                                                                                                                                                                                                                                                                                                                                           | -0.06 (-0.18, 0.05)                                 | -0.08 (-0.29, 0.14)                                                 |
| Males                                                                                                                                                                                                                                                                                                                                                         | -0.07 (-0.22, 0.08)                                 | -0.11 (-0.42, 0.20)                                                 |
| Females                                                                                                                                                                                                                                                                                                                                                       | -0.06 (-0.23, 0.10)                                 | -0.02 (-0.48, 0.44)                                                 |
| <b>CAT</b>                                                                                                                                                                                                                                                                                                                                                    |                                                     |                                                                     |
| All                                                                                                                                                                                                                                                                                                                                                           | 0 (-0.09, 0.10)                                     | 0.05 (-0.07, 0.18)                                                  |
| Males                                                                                                                                                                                                                                                                                                                                                         | -0.01 (-0.15, 0.12)                                 | 0.07 (-0.15, 0.29)                                                  |
| Females                                                                                                                                                                                                                                                                                                                                                       | 0.02 (-0.12, 0.17)                                  | 0.06 (-0.19, 0.30)                                                  |
| <p>*Pearson's correlation coefficients with log<sub>2</sub> p-mtDNA as among all participants and within each group<br/> Abbreviations: r=correlation coefficient, CI=95% confidence interval, FEV<sub>1</sub>=forced expiratory volume in 1 second, 6MWD=six-minute walk distance, SGRQ=St. George's Respiratory Questionnaire, CAT=COPD Assessment Test</p> |                                                     |                                                                     |

**A)**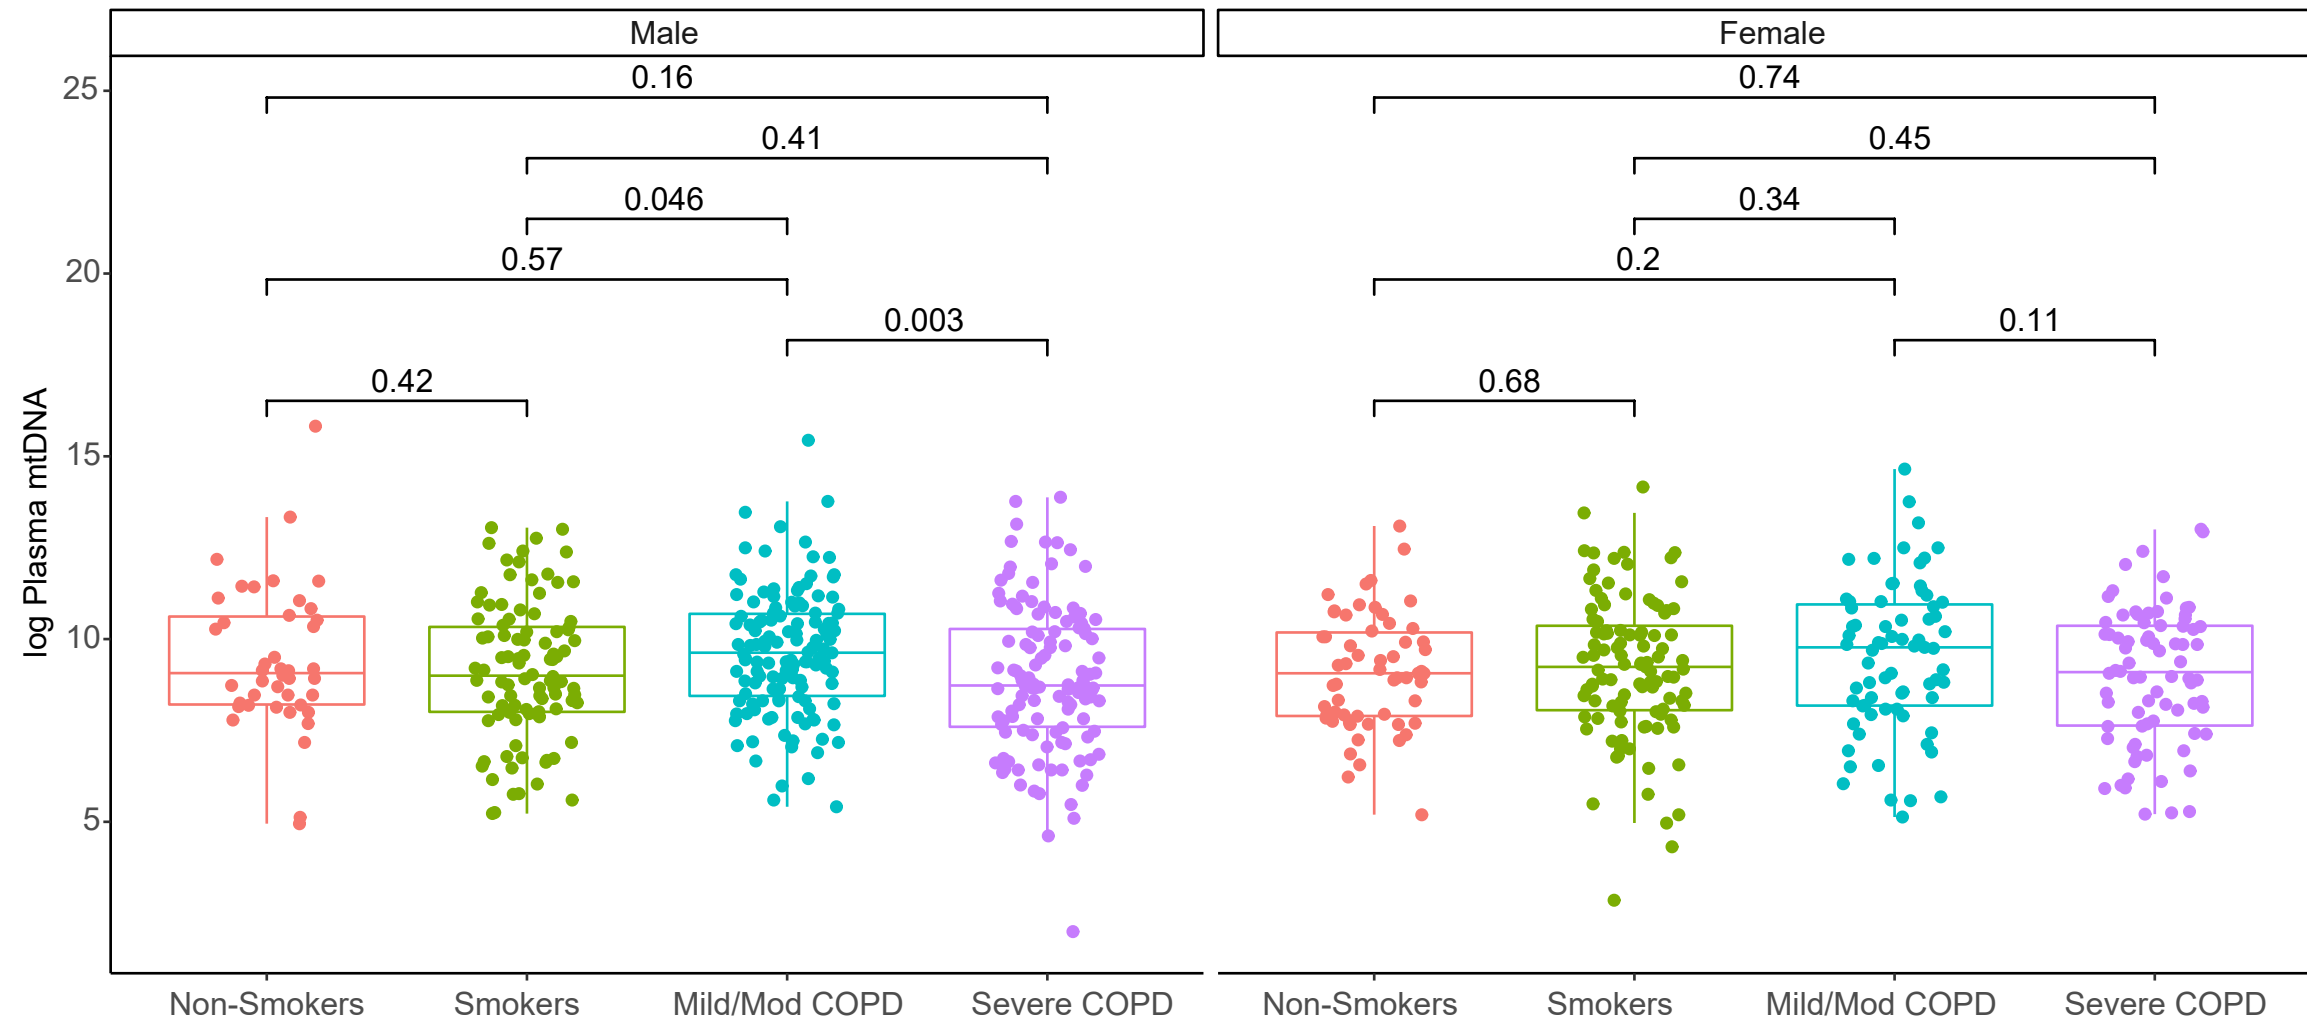**B)**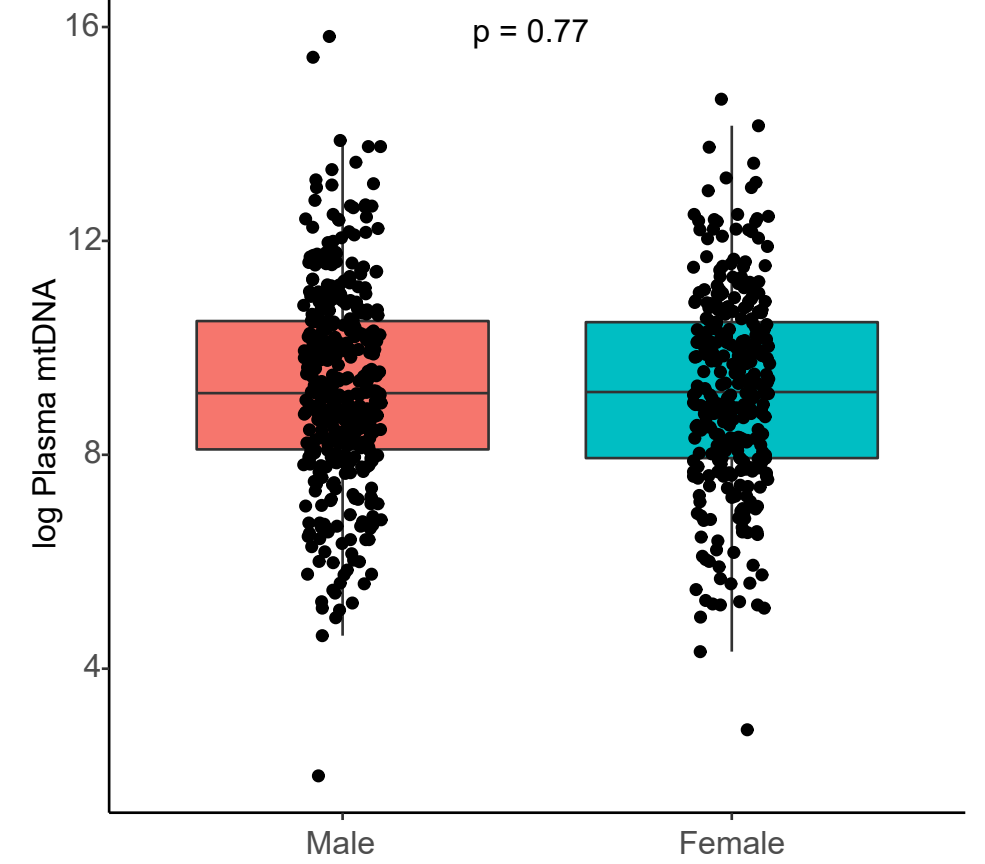**Supplementary Figure 1**

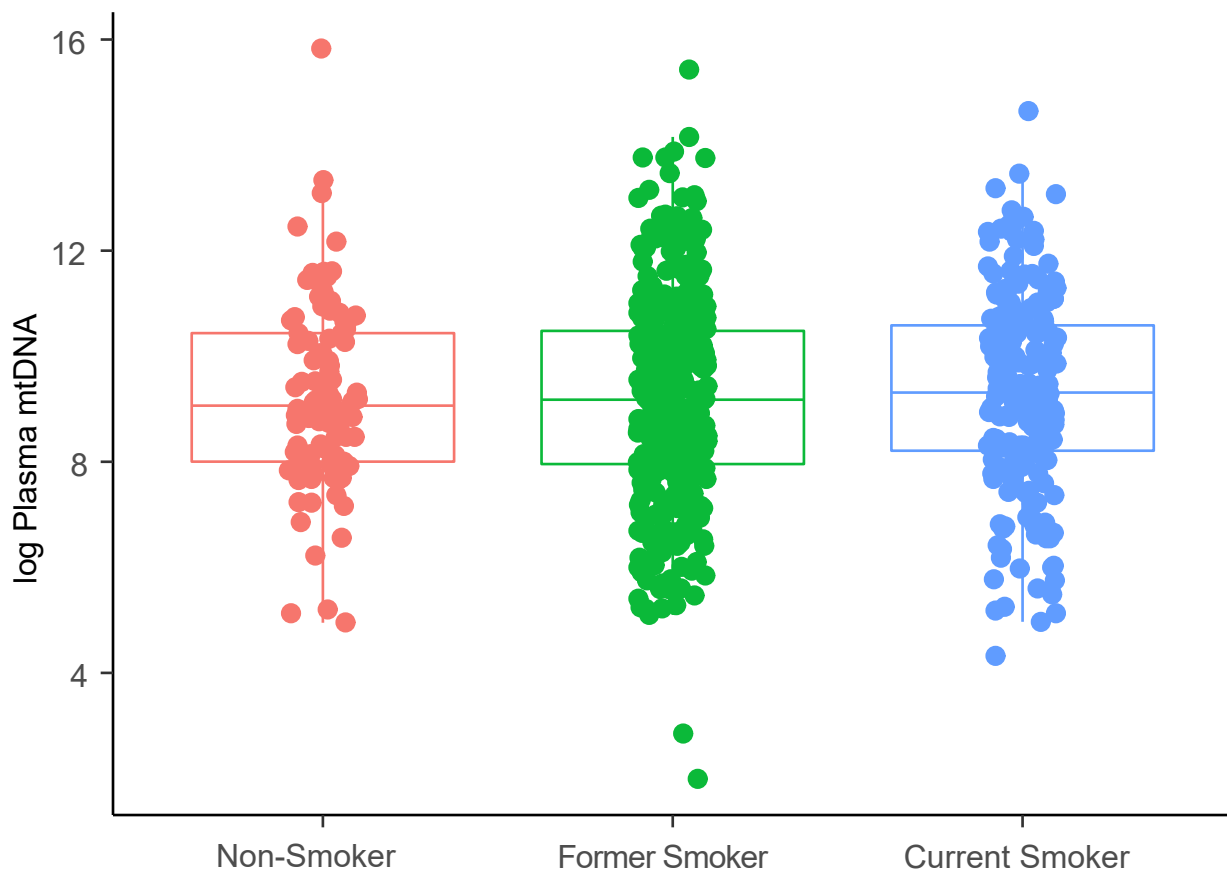

**Supplementary Figure 2**

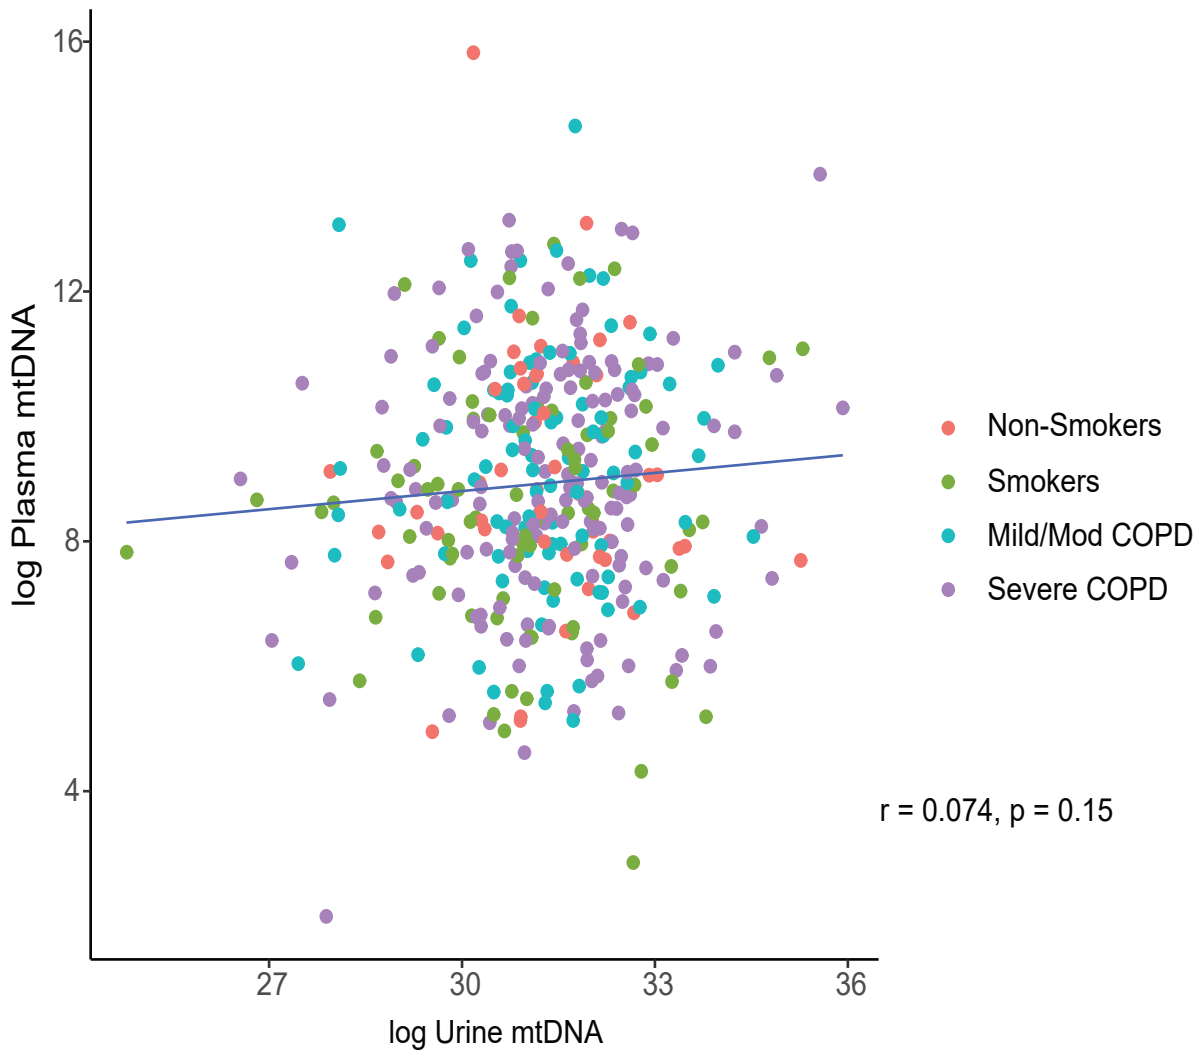

**Supplementary Figure 3**

**A)**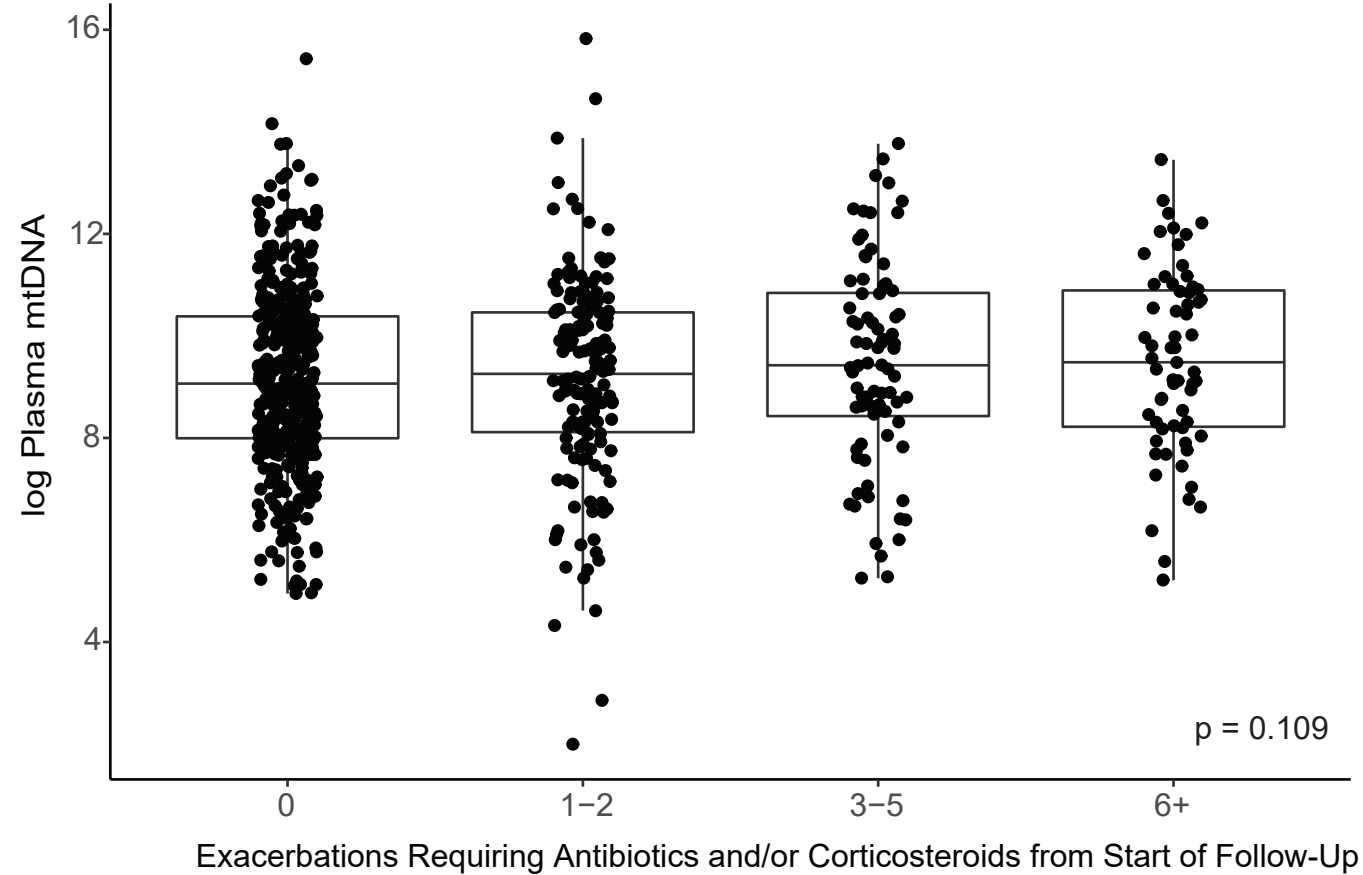**B)**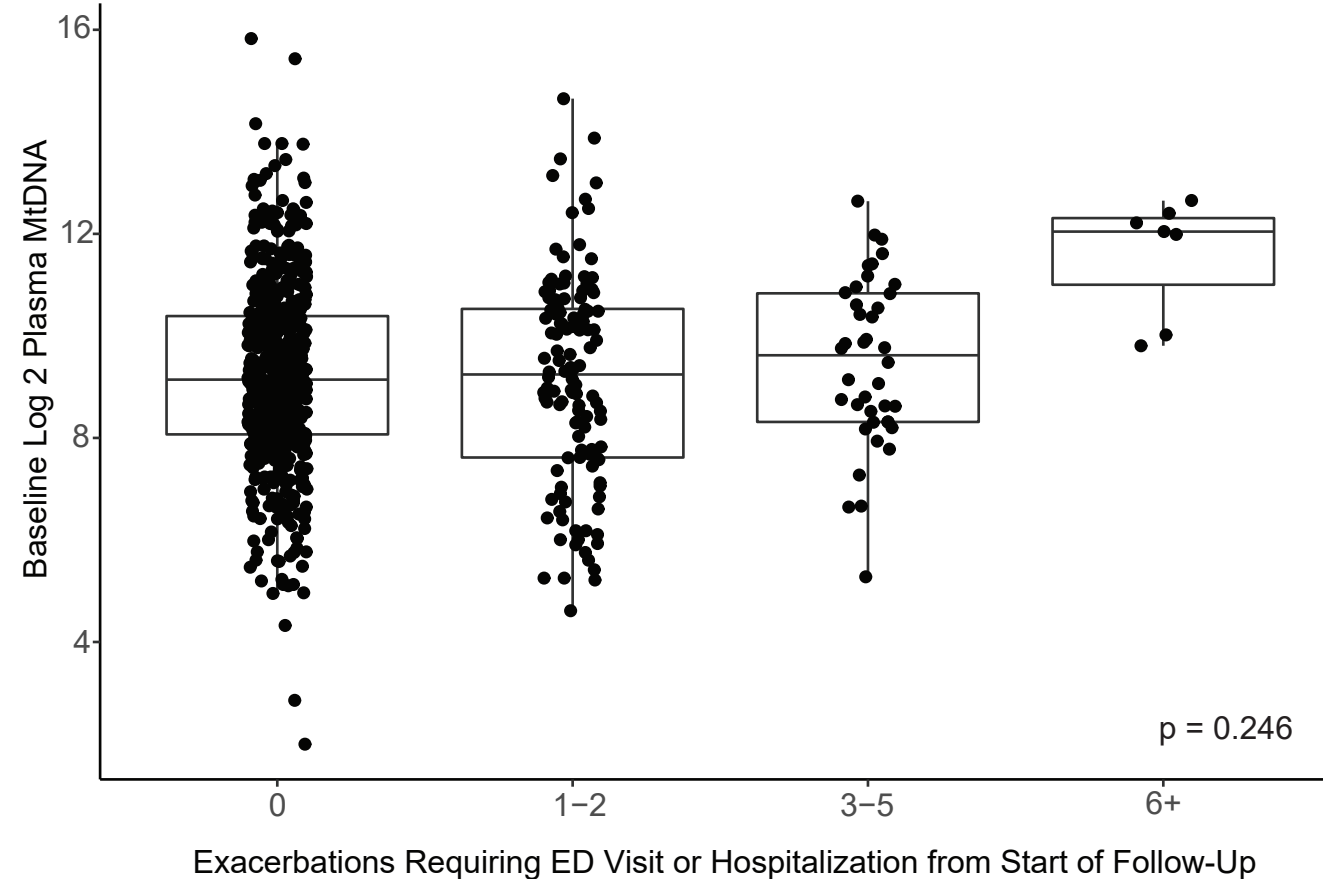**Supplementary Figure 4**

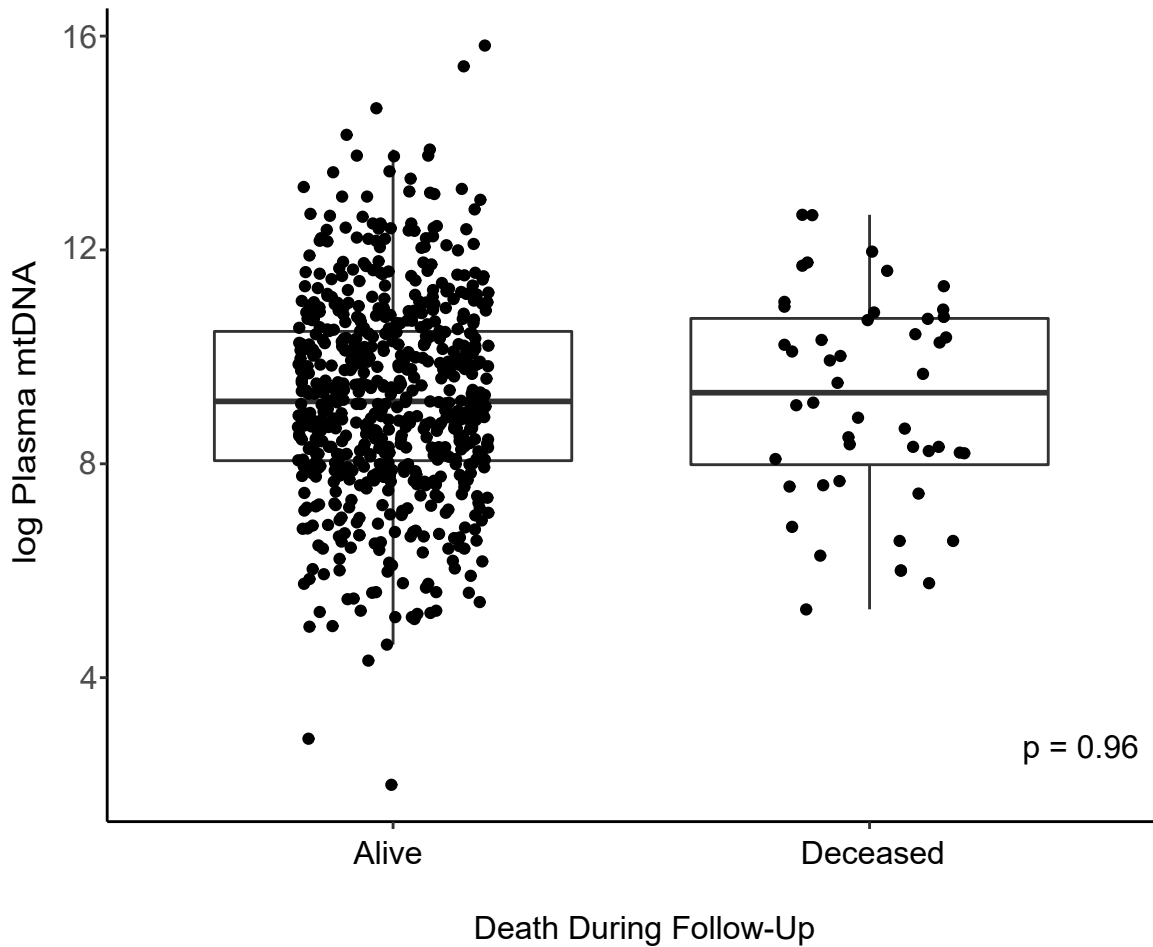

**Supplementary Figure 5**
